# Supplementary material for: Sophora japonica Extract Inhibits Ulcerative Colitis and Colitis-Associated Colon Cancer via Regulation of Lipid Metabolism
Source: Hindawi journal article supplement (doi:10.1155/2024/5552747), 2024-03-19
Supplement: f1 [file 5552747.f1.zip]

Archive with 2 entries (2 files):
- FigureS1.pdf
- Table S1 & Table S2.pdf
