# Supplementary material for: Sophora japonica Extract Inhibits Ulcerative Colitis and Colitis-Associated Colon Cancer via Regulation of Lipid Metabolism
Source: Hindawi journal article supplement (doi:10.1155/2024/5552747), 2024-03-19
Supplement: f1 [file 5552747.f1.zip › FigureS1.pdf]

A

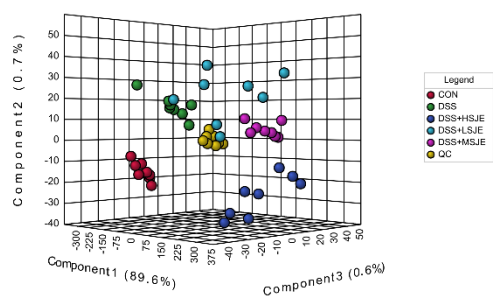

B

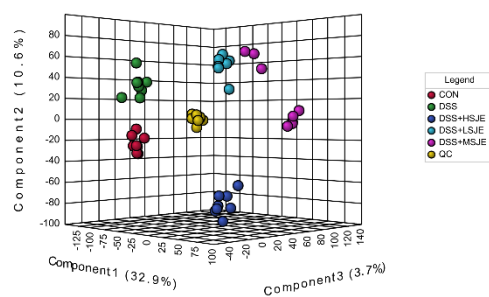

C

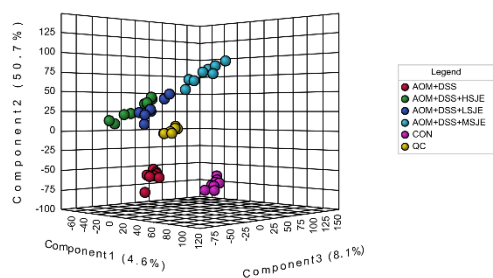

D

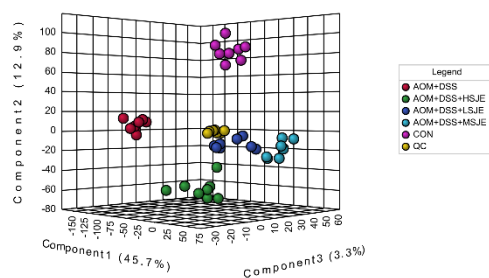

Figure S1. PLS-DA analysis of all samples. PLS-DA plots of all samples from UC experiments in negative ion mode (A) and positive ion mode (B). PLS-DA plots of all samples from CAC experiments in negative ion mode (C) and positive ion mode (D).
