# Supplementary material for: Sophora japonica Extract Inhibits Ulcerative Colitis and Colitis-Associated Colon Cancer via Regulation of Lipid Metabolism
Source: Hindawi journal article supplement (doi:10.1155/2024/5552747), 2024-03-19
Supplement: f1 [file 5552747.f1.zip › Table S1 & Table S2.pdf]

**Table S1. Scoring criteria for pathological states of UC**

| Evaluation parameter    | Score | Characteristic description                                                                                                |
|-------------------------|-------|---------------------------------------------------------------------------------------------------------------------------|
| Inflammatory infiltrate | 0     | Normal                                                                                                                    |
|                         | 1     | Very little infiltration in the intrinsic layer, focused on multiple foci                                                 |
|                         | 2     | Mild infiltration of the intrinsic layer, multifocal, mild gland separation                                               |
|                         | 3     | Moderate-to-mixed infiltrate, multifocal, minimal edema                                                                   |
|                         | 4     | Significantly mixed into the submucosa and lamina propria with extensive glandular separation, lymphoid aggregates, edema |
| Epithelial cells        | 0     | Normal                                                                                                                    |
|                         | 1     | Minimal: focal mucosal hyperplasia                                                                                        |
|                         | 2     | Mild: multifocal clustering of epithelial cells, increased number of cupped cells                                         |
|                         | 3     | Moderate: multifocal to locally extensive epithelial attenuation or erosion of cupular cell hyperplasia                   |
|                         | 4     | Obvious: localized widespread to subtotal erosions or ulcers                                                              |
| Glandular               | 0     | Normal                                                                                                                    |
|                         | 1     | Minimal: rare glandular dilatation                                                                                        |
|                         | 2     | Mild: multifocal glandular dilatation                                                                                     |
|                         | 3     | Moderate: multifocal glandular dilated abscess with occasional glandular abscission                                       |
| Lesion depth            | 0     | Normal                                                                                                                    |
|                         | 1     | Mucous membrane                                                                                                           |
|                         | 2     | Mucosa and submucosa                                                                                                      |
|                         | 3     | Transmural                                                                                                                |
| Extent of lesion        | 0     | None                                                                                                                      |
|                         | 1     | Minimal: <10%                                                                                                             |
|                         | 2     | Mild: 10%–25%                                                                                                             |
|                         | 3     | Moderate: 26%–50%                                                                                                         |
|                         | 4     | Significant: >50%                                                                                                         |

**Table S2. Scoring criteria for pathological states of CAC**

| Evaluation parameter                         | Score | Characteristic description                                                                                 |
|----------------------------------------------|-------|------------------------------------------------------------------------------------------------------------|
| Histological morphology                      | 0     | Normal                                                                                                     |
|                                              | 1     | Recess shortened by one third from the basal layer with mild inflammation of lamina propria                |
|                                              | 2     | Recess shortened by two thirds from the basal layer with moderate inflammation of lamina propria           |
|                                              | 3     | Recess disappeared with severe inflammation of lamina propria, and mucosal epithelium still existed        |
|                                              | 4     | Disappearance of mucosal epithelium and severe inflammation (ulcer) of lamina propria mucosa and submucosa |
| Decrease in intestinal epithelial cells      | 0     | Normal                                                                                                     |
|                                              | 1     | Single-cell reduction                                                                                      |
|                                              | 2     | Group cytopenia                                                                                            |
|                                              | 3     | Flat-ulcer formation                                                                                       |
| Formation of inflammation of glandular fossa | 0     | Normal                                                                                                     |
|                                              | 1     | Single inflammatory cell                                                                                   |
|                                              | 2     | Adenocarpus inflammation                                                                                   |
|                                              | 3     | Fossa abscess                                                                                              |
|                                              | 1     | Mild increase                                                                                              |
|                                              | 2     | Moderate increase                                                                                          |
|                                              | 3     | Significant increase                                                                                       |
| Monocytes in lamina propria of the mucosa    | 0     | Normal                                                                                                     |
|                                              | 1     | Mild increase                                                                                              |
|                                              | 2     | Moderate increase                                                                                          |
|                                              | 3     | Significant increase                                                                                       |
| Neutrophilic granulocyte                     | 0     | Normal                                                                                                     |
|                                              | 1     | Mild increase                                                                                              |
|                                              | 2     | Moderate increase                                                                                          |
|                                              | 3     | Significant increase                                                                                       |
| Epithelial hyperplasia                       | 0     | Normal                                                                                                     |
|                                              | 1     | Mild                                                                                                       |
|                                              | 2     | Moderate                                                                                                   |
|                                              | 3     | Pseudopolyp                                                                                                |
| Tumor score                                  | 0     | Normal                                                                                                     |
|                                              | 1     | Low-grade dysplasia                                                                                        |
|                                              | 2     | High-grade dysplasia                                                                                       |
|                                              | 3     | Invasive adenocarcinoma                                                                                    |
